# Supplementary material for: Self-Report Instruments for Clinical Monitoring of Psychosis Risk States
Source: Atypon-hosted journal article supplement (doi:10.1176/appi.ps.201500063), 2015-11-16
Supplement: appi.ps.201500063.ds001.pdf [file appi.ps.201500063.ds001.pdf]

Supplementary Table A  
Psychosis Risk Screening Tools

| Measure                                                            | Description                                                                                                                                                                                                                                                                                                                                                                                                                                                                                                                                                                                                                |
|--------------------------------------------------------------------|----------------------------------------------------------------------------------------------------------------------------------------------------------------------------------------------------------------------------------------------------------------------------------------------------------------------------------------------------------------------------------------------------------------------------------------------------------------------------------------------------------------------------------------------------------------------------------------------------------------------------|
| Prime Screen Revised (Miller et al., 2004)                         | Developed by the SIPS author group, the Prime Screen contains 12 Likert-type items describing attenuated symptoms and asks respondents to choose from 7 response choices ranging from “definitely disagree” to “definitely agree.”<br>Average administration time: 1:40<br>Flesch-Kincaid reading grade level estimate: 6.8                                                                                                                                                                                                                                                                                                |
| Prodromal Questionnaire, Brief Version (PQ-B) (Loewy et al., 2011) | The PQ-B is a 21-item self-report questionnaire. Items are answered true/false and also contain ‘distress scores’ in which respondents rate their level of concern with regard to each item on a scale of 1 (‘strongly disagree’ or no distress) to 5 (‘strongly agree’ or substantial distress). Total weighted distress scores are calculated by summing the distress scores for items that are marked ‘true.’ Respondents are asked to consider only experiences occurring <i>not</i> under the influence of drugs or alcohol.<br>Average administration time: 2:30<br>Flesch-Kincaid reading grade level estimate: 8.6 |
| Youth Psychosis at Risk Questionnaire (YPARQ-B) (Ord et al., 2004) | The abbreviated YPARQ (YPARQ-B) is a 28-item self-report measure developed from the Comprehensive Assessment of At-Risk Mental States. Responses are ‘yes’ (scored as one) and ‘no/unsure’ (scored as zero).<br>Average administration time: 3:55<br>Flesch-Kincaid reading grade level estimate: 7.6                                                                                                                                                                                                                                                                                                                      |
